# Supplementary material
Source: HighWire-hosted journal article supplement (https://gh.bmj.com/content/8/3/e011763)
Supplement: inline-supplementary-material-5 [file inline-supplementary-material-5.pdf]

**Supplementary table 3: Crude and Adjusted Hazard Ratios for non-perioperative mortality in 332\* Aboriginal RHD Surgical Patients.**

| Preoperative characteristics                     | Univariate Analysis   |         | Multivariate Analysis |         |
|--------------------------------------------------|-----------------------|---------|-----------------------|---------|
|                                                  | Hazard Ratio (95% CI) | P-value | Hazard Ratio (95% CI) | P-value |
| Age at first surgery $\geq$ 16 years             | 3.7 (1.5-9.2)         | 0.004   | 3.0 (1.1-8.3)         | 0.04    |
| Female <sup>a</sup>                              | 1.1 (0.7-1.8)         | 0.6     | 1.1 (0.7-1.9)         | 0.6     |
| Severe pulmonary hypertension <sup>b</sup>       | 2.4 (1.5-3.9)         | <0.001  | 1.9 (1.1-3.1)         | 0.01    |
| NYHA class 3 and 4                               | 1.8 (1.1-3.0)         | 0.01    | 1.2 (0.7-2.1)         | 0.5     |
| Atrial fibrillation or flutter                   | 1.0 (0.6-1.7)         | 1.0     |                       |         |
| Moderate or greater LV dysfunction               | 2.7 (0.8-8.6)         | 0.09    | 3.2 (0.9-11.1)        | 0.06    |
| Diabetes mellitus                                | 2.5 (1.4-4.3)         | 0.001   | 1.3 (0.6-2.8)         | 0.5     |
| Smoking history <sup>c</sup>                     | 1.6 (1.0-2.7)         | 0.045   | 1.0 (0.5-1.9)         | 0.9     |
| Hypercholesterolemia                             | 1.8 (1.0-3.2)         | 0.03    | 1.4 (0.7-2.7)         | 0.3     |
| Hypertension                                     | 1.7 (1.1-2.8)         | 0.03    | 0.8 (0.4-1.7)         | 0.7     |
| Severity of coronary artery disease <sup>d</sup> | 4.0 (1.6-9.9)         | 0.003   | 2.7 (1.0-7.6)         | 0.06    |
| Previous Myocardial infarction                   | 1.6 (0.6-4.0)         | 0.3     |                       |         |
| Transient ischemic attack                        | 1.9 (0.5-7.9)         | 0.4     |                       |         |
| Embolic stroke                                   | 1.4 (0.4-4.6)         | 0.5     |                       |         |
| Haemorrhagic stroke                              |                       |         |                       |         |
| Bronchiectasis                                   | 2.2 (0.9-5.4)         | 0.09    | 1.3 (0.4-3.8)         | 0.6     |
| Chronic obstructive pulmonary disease            | 2.3 (1.2-4.1)         | 0.007   | 1.0 (0.4-2.6)         | 1.0     |
| Obstructive sleep apnoea                         | 2.6 (0.6-10.8)        | 0.2     |                       |         |
| Chronic kidney disease <sup>e</sup>              | 9.1 (4.3-19.1)        | <0.001  | 6.4 (2.9-14.3)        | <0.001  |

RHD: Rheumatic heart disease, LV: Left ventricle, NYHA: New York Heart Assessment.

\*All perioperative deaths, 5 (1.5%) at the first and 5 (6.8%) at the second surgery are excluded

<sup>a</sup> binary defined by health workers.

<sup>b</sup> pulmonary hypertension  $\geq$ 50mmHg (at cardiac catheterisation or estimated at echocardiography).

<sup>c</sup> current or previous tobacco smoker.

<sup>d</sup> moderate to severe and severe stenosis on coronary angiogram pre-first surgery.

<sup>e</sup> estimated glomerular filtration rate < 60ml/min/1.73m<sup>2</sup>.
